# Supplementary material for: Na10Zn(NO3)4(SO3S)4: a nonlinear optical crystal combining inorganic π-conjugated and non-π-conjugated heteroanion groups
Source: Royal Society of Chemistry journal article supplement (doi:10.1039/d3qi02107f), 2023-11-07
Supplement: d3qi02107f1.pdf [file d3qi02107f1.pdf]

## Supporting Information

### **Na<sub>10</sub>Zn(NO<sub>3</sub>)<sub>4</sub>(SO<sub>3</sub>S)<sub>4</sub> : a nonlinear optical crystal combining inorganic π-conjugated and non-π-conjugated heteroanion groups**

Zihao Yu,<sup>a</sup> Qingran Ding,<sup>\*, a</sup> Yuhang Jiang,<sup>a</sup> Weiqi Huang,<sup>b</sup> Changsheng Yang,<sup>a</sup> Sangen Zhao,<sup>b</sup> and Junhua Luo<sup>\*, a, b</sup>

<sup>1</sup> School of Chemistry and Chemical Engineering, Jiangxi Normal University, Nanchang, 330022, China

<sup>2</sup> State Key Laboratory of Structural Chemistry, Fujian Institute of Research on the Structure of Matter, Chinese Academy of Sciences, Fuzhou, Fujian 350002, China

\*Corresponding Author(s): Junhua Luo: [jhluo@fjirsm.ac.cn](mailto:jhluo@fjirsm.ac.cn); [dqr@jxnu.edu.cn](mailto:dqr@jxnu.edu.cn);

## Contents

|                                                                                                                                                                                                                                                                                                      |    |
|------------------------------------------------------------------------------------------------------------------------------------------------------------------------------------------------------------------------------------------------------------------------------------------------------|----|
| Raman Spectra.....                                                                                                                                                                                                                                                                                   | 3  |
| Thermal Stability.....                                                                                                                                                                                                                                                                               | 3  |
| Table S1. Crystal data and structure refinement for $\text{Na}_{10}\text{Zn}(\text{NO}_3)_4(\text{SO}_3\text{S})_4$ .....                                                                                                                                                                            | 4  |
| Table S2. Atomic coordinates ( $\times 10^4$ ) and equivalent isotropic displacement parameters ( $\text{\AA}^2 \times 10^3$ ) for $\text{Na}_{10}\text{Zn}(\text{NO}_3)_4(\text{SO}_3\text{S})_4$ . $U(\text{eq})$ is defined as one third of the trace of the orthogonalized $U_{ij}$ tensor. .... | 5  |
| Table S3. Selected bond lengths ( $\text{\AA}$ ) for $\text{Na}_{10}\text{Zn}(\text{NO}_3)_4(\text{SO}_3\text{S})_4$ .....                                                                                                                                                                           | 6  |
| Table S4. Selected Angles ( $^\circ$ ) for $\text{Na}_{10}\text{Zn}(\text{NO}_3)_4(\text{SO}_3\text{S})_4$ .....                                                                                                                                                                                     | 8  |
| Table S5. Anisotropic displacement parameters ( $\text{\AA}^2 \times 10^3$ ) for $\text{Na}_{10}\text{Zn}(\text{NO}_3)_4(\text{SO}_3\text{S})_4$ .....                                                                                                                                               | 9  |
| Figure S1. Energy dispersive X-ray spectroscopy result for $\text{Na}_{10}\text{Zn}(\text{NO}_3)_4(\text{SO}_3\text{S})_4$ .....                                                                                                                                                                     | 10 |
| Figure S2. Raman spectra of $\text{Na}_{10}\text{Zn}(\text{NO}_3)_4(\text{SO}_3\text{S})_4$ .....                                                                                                                                                                                                    | 10 |
| Figure S3. The crystal photograph of $\text{Na}_{10}\text{Zn}(\text{NO}_3)_4(\text{SO}_3\text{S})_4$ . ....                                                                                                                                                                                          | 11 |
| Figure S4. TG and TGA curves for $\text{Na}_{10}\text{Zn}(\text{NO}_3)_4(\text{SO}_3\text{S})_4$ . ....                                                                                                                                                                                              | 11 |
| Figure S5. The thickness of $\text{Na}_{10}\text{Zn}(\text{NO}_3)_4(\text{SO}_3\text{S})_4$ . ....                                                                                                                                                                                                   | 12 |
| References. ....                                                                                                                                                                                                                                                                                     | 13 |

### **Raman Spectra.**

The Raman spectra of  $\text{Na}_{10}\text{Zn}(\text{NO}_3)_4(\text{SO}_3\text{S})_4$  was obtained using the CCD detector of the LABRAM HR evolution spectrometer with 532 nm radiation.<sup>1</sup> Approximately 0.01 g  $\text{Na}_{10}\text{Zn}(\text{NO}_3)_4(\text{SO}_3\text{S})_4$  powders were placed on a slide and exposed to laser irradiation with a wavelength of 532 nm.<sup>2</sup> The Raman spectra of  $\text{Na}_{10}\text{Zn}(\text{NO}_3)_4(\text{SO}_3\text{S})_4$  were recorded in the  $4000\text{--}100\text{ cm}^{-1}$  region ( $2.5\text{--}100\text{ }\mu\text{m}$ )<sup>1</sup> and shown in Figure S2.

### **Thermal Stability.**

The thermal stability was investigated by the thermogravimetry (TG) on a simultaneous NETZSCH STA 449C thermal analyzer in an atmosphere of flowing  $\text{N}_2$ . Approximately 10.3 mg  $\text{Na}_{10}\text{Zn}(\text{NO}_3)_4(\text{SO}_3\text{S})_4$  powders were placed into an  $\text{Al}_2\text{O}_3$  crucible, heated at a rate of  $15\text{ K min}^{-1}$  from room temperature to  $1073\text{ K}$ .<sup>3</sup>

**Table S1.** Crystal data and structure refinement for Na<sub>10</sub>Zn(NO<sub>3</sub>)<sub>4</sub>(SO<sub>3</sub>S)<sub>4</sub>.

| Empirical formula                                | Na <sub>10</sub> Zn(NO <sub>3</sub> ) <sub>4</sub> (SO <sub>3</sub> S) <sub>4</sub> |
|--------------------------------------------------|-------------------------------------------------------------------------------------|
| Formula weight                                   | 991.79                                                                              |
| Wavelength (Å)                                   | 1.54056                                                                             |
| Temperature (K)                                  | 293                                                                                 |
| Crystal system, space group                      | tetragonal, $P\bar{4}$                                                              |
| a, b, c (Å)                                      | 11.2790(2), 11.2790(2), 5.3919(2)                                                   |
| $\alpha$ , $\beta$ , $\gamma$ (°)                | 90, 90, 90                                                                          |
| Volume (Å <sup>3</sup> )                         | 685.94(4)                                                                           |
| Z, Calculated density (g/cm <sup>3</sup> )       | 1, 2.401                                                                            |
| Absorption coefficient (mm <sup>-1</sup> )       | 9.540                                                                               |
| F(000)                                           | 488.0                                                                               |
| Crystal size (mm)                                | 0.08 × 0.03 × 0.03                                                                  |
| 2 $\theta$ range for data collection (deg.)      | 7.84 to 153.14                                                                      |
| Limiting indices                                 | -14 ≤ h ≤ 14, -14 ≤ k ≤ 13, -4 ≤ l ≤ 6                                              |
| Reflections collected / unique                   | 6360                                                                                |
| Independent reflections                          | 1422 [R <sub>int</sub> = 0.0385, R <sub>sigma</sub> = 0.0289]                       |
| Data / restraints / parameters                   | 1422/0/108                                                                          |
| Goodness-of-fit on F <sup>2</sup>                | 1.061                                                                               |
| Final R indices [I > 2σ(I)]                      | R <sub>1</sub> = 0.0207, wR <sub>2</sub> = 0.0530                                   |
| R indices (all data)                             | R <sub>1</sub> = 0.0213, wR <sub>2</sub> = 0.0534                                   |
| Largest diff. peak and hole (e.Å <sup>-3</sup> ) | 0.23/-0.33                                                                          |
| Flack parameter                                  | 0.0 (2)                                                                             |

[a]  $R_1 = \sum ||F_o| - |F_c|| / \sum |F_o|$  and  $wR_2 = [\sum w(F_o^2 - F_c^2)^2 / \sum wF_o^4]^{1/2}$  for  $F_o^2 > 2\sigma(F_o^2)$ .

**Table S2.** Atomic coordinates ( $\times 10^4$ ) and equivalent isotropic displacement parameters ( $\text{\AA}^2 \times 10^3$ ) for  $\text{Na}_{10}\text{Zn}(\text{NO}_3)_4(\text{SO}_3\text{S})_4$ .  $U(\text{eq})$  is defined as one third of the trace of the orthogonalized  $U_{ij}$  tensor.

| Atoms | X          | Y          | Z          | $U(\text{eq})$ |
|-------|------------|------------|------------|----------------|
| Zn1   | 3725.2(14) | 3373.5(15) | 3650.3(16) | 8.8(3)         |
| Zn1   | 5027(5)    | 7455(7)    | 3113(6)    | 16.9(13)       |
| S1    | 7445.7(11) | 4605.6(18) | 3570.2(12) | 6.8(3)         |
| S2    | 4991.9(11) | 9606.0(19) | 3674.0(13) | 9.1(3)         |
| O1    | 5346.5(16) | 5881(3)    | 3512(2)    | 10.8(5)        |
| O2    | 2027.8(16) | 5879(3)    | 3497.1(19) | 10.6(5)        |
| O3    | 2903(4)    | 3238(5)    | 6304(4)    | 71.1(12)       |
| O4    | 1026(5)    | 5305(8)    | 3158(7)    | 20.9(15)       |
| O5    | 4924(4)    | 7078(6)    | 6295(4)    | 73.0(12)       |
| O6    | 5882(2)    | 2026(3)    | 6494(3)    | 41.5(7)        |
| N1    | 8007.8(15) | 4137(2)    | 6513.3(18) | 8.3(4)         |
| Na1   | 2004(5)    | 7456(7)    | 3023(6)    | 15.2(13)       |
| Na2   | 4481(5)    | 4853(8)    | 3122(7)    | 22.7(16)       |
| Na3   | 2571(5)    | 4821(7)    | 3078(6)    | 17.6(14)       |

**Table S3.** Selected bond lengths (Å) for Na<sub>10</sub>Zn(NO<sub>3</sub>)<sub>4</sub>(SO<sub>3</sub>S)<sub>4</sub>.

| Atom Atom           | lengths (Å) | Atom Atom             | lengths (Å) |
|---------------------|-------------|-----------------------|-------------|
| Zn1-S1              | 2.3590(6)   | O4-Na2                | 2.444(2)    |
| Zn1-S1 <sup>1</sup> | 2.3590(6)   | Na1-O5 <sup>4</sup>   | 2.5009(17)  |
| Zn1-S1 <sup>2</sup> | 2.3590(6)   | Na1-O2 <sup>6</sup>   | 2.3201(18)  |
| Zn1-S1 <sup>3</sup> | 2.3590(6)   | Na1-O2 <sup>10</sup>  | 2.3201(18)  |
| S2-S1               | 2.0274(7)   | Na1-O1 <sup>4</sup>   | 2.3465(18)  |
| S2-O3               | 1.4576(16)  | Na1-Na3 <sup>10</sup> | 3.9829(14)  |
| S2-O2               | 1.4573(17)  | Na1-Na3               | 3.6102(13)  |
| S2-O1               | 1.4746(17)  | Na1-Na3 <sup>6</sup>  | 3.9829(14)  |
| S2-Na3 <sup>4</sup> | 3.3321(10)  | Na1-Na3 <sup>4</sup>  | 3.6102(13)  |
| S2-Na2 <sup>3</sup> | 3.3700(11)  | Na1-Na2 <sup>5</sup>  | 3.4262(10)  |
| S2-Na2 <sup>5</sup> | 3.3859(11)  | Na1-Na2 <sup>8</sup>  | 3.4262(10)  |
| S1-Na2 <sup>5</sup> | 3.0259(13)  | Na3-S2 <sup>4</sup>   | 3.3321(10)  |
| O6-N1               | 1.248(3)    | Na3-O6 <sup>8</sup>   | 2.503(2)    |
| O6-Na3 <sup>6</sup> | 2.498(2)    | Na3-O6 <sup>9</sup>   | 2.498(2)    |
| O6-Na3 <sup>7</sup> | 2.503(2)    | Na3-O5 <sup>9</sup>   | 2.584(2)    |
| O6-Na2 <sup>6</sup> | 2.761(2)    | Na3-O1 <sup>4</sup>   | 2.3528(19)  |
| O3-Na3              | 2.4729(18)  | Na3-N1 <sup>8</sup>   | 2.965(2)    |
| O3-Na2              | 2.2791(18)  | Na3-N1 <sup>9</sup>   | 2.927(2)    |
| O5-N1               | 1.253(3)    | Na3-O4 <sup>8</sup>   | 2.653(2)    |
| O5-Na1              | 2.5009(17)  | Na3-Na1 <sup>9</sup>  | 3.9829(14)  |
| O5-Na3 <sup>6</sup> | 2.584(2)    | Na3-Na2 <sup>11</sup> | 3.9814(15)  |
| O5-Na3              | 2.848(2)    | Na3-Na2 <sup>8</sup>  | 3.7152(14)  |
| O5-Na2 <sup>8</sup> | 2.981(2)    | Na3-Na2               | 3.3541(14)  |
| O2-Na1 <sup>9</sup> | 2.3201(18)  | Na2-S2 <sup>12</sup>  | 3.3858(11)  |
| O2-Na2 <sup>3</sup> | 2.286(2)    | Na2-S1 <sup>1</sup>   | 3.3700(11)  |
| O1-Na1              | 2.3465(18)  | Na2-S1 <sup>12</sup>  | 3.0259(13)  |
| O1-Na3 <sup>4</sup> | 2.3528(19)  | Na2-O6 <sup>9</sup>   | 2.761(2)    |
| O1-Na25             | 2.4859(19)  | Na2-O5 <sup>7</sup>   | 2.981(2)    |
| N1-O4               | 1.249(3)    | Na2-O2 <sup>1</sup>   | 2.286(2)    |
| N1-Na3 <sup>7</sup> | 2.965(2)    | Na2-O1 <sup>12</sup>  | 2.4859(19)  |
| N1-Na3              | 3.053(2)    | Na2-Na1 <sup>12</sup> | 3.4262(10)  |

|                     |          |                       |            |
|---------------------|----------|-----------------------|------------|
| N1-Na3 <sup>6</sup> | 2.927(2) | Na2-Na3 <sup>7</sup>  | 3.7152(14) |
| O4-Na3 <sup>7</sup> | 2.653(2) | Na2-Na3 <sup>13</sup> | 3.9814(15) |
| O4-Na3              | 2.491(2) |                       |            |

---

Symmetry transformations used to generate equivalent atoms:

<sup>1</sup>-1/2+X,1/2-Y,-1/2+Z; <sup>2</sup>+X,1-Y,-1/2+Z; <sup>3</sup>1/2+X,1/2-Y,-1/2+Z; <sup>4</sup>1/2+X,1/2+Y,+Z; <sup>5</sup>1/2+X,-1/2+Y,+Z; <sup>6</sup>+X,1+Y,+Z; <sup>7</sup>+X,2-Y,-1/2+Z; <sup>8</sup>-1/2+X,1/2+Y,+Z; <sup>9</sup>-1/2+X,3/2-Y,-1/2+Z; <sup>10</sup>1/2+X,1/2-Y,1/2+Z; <sup>11</sup>+X,-1+Y,+Z; <sup>12</sup>+X,1-Y,1/2+Z; <sup>13</sup>1/2+X,3/2-Y,1/2+Z; <sup>14</sup>-1/2+X,1/2-Y,1/2+Z; <sup>15</sup>-1/2+X,-1/2+Y,+Z

**Table S4.** Selected angles (°) for Na<sub>10</sub>Zn(NO<sub>3</sub>)<sub>4</sub>(SO<sub>3</sub>S)<sub>4</sub>.

| Atom Atom Atom                      | Angles (°)  | Atom Atom Atom | Angles (°) |
|-------------------------------------|-------------|----------------|------------|
| S1 Zn1 S1                           | 105.22(3)   | O6 N1 O5       | 119.4(2)   |
| S1 Zn1 S1 <sup>2</sup>              | 111.637(16) | O6 N1 O4       | 119.92(18) |
| S1 <sup>3</sup> Zn1 S1 <sup>2</sup> | 105.22(3)   | O4 N1 O5       | 120.7(2)   |
| S1 <sup>1</sup> Zn1 S1 <sup>3</sup> | 111.637(16) | O2 S2 S1       | 109.66(8)  |
| S1 Zn1 S1 <sup>3</sup>              | 111.637(16) | O2 S2 O3       | 111.37(11) |
| S1 <sup>1</sup> Zn1 S1 <sup>2</sup> | 111.637(16) | O2 S2 O1       | 110.43(11) |
| S2 S1 Zn1                           | 111.98(3)   | O1 S2 S1       | 102.87(7)  |
| O3 S2 O1                            | 110.32(10)  | O3 S2 O1       | 111.88(7)  |

Symmetry transformations used to generate equivalent atoms:

<sup>1</sup>-1/2+X,1/2-Y,-1/2+Z; <sup>2</sup>+X,1-Y,-1/2+Z; <sup>3</sup>1/2+X,1/2-Y,-1/2+Z; <sup>4</sup>1/2+X,1/2+Y,+Z; <sup>5</sup>1/2+X,-1/2+Y,+Z; <sup>6</sup>+X,1+Y,+Z; <sup>7</sup>+X,2-Y,-1/2+Z; <sup>8</sup>-1/2+X,1/2+Y,+Z; <sup>9</sup>-1/2+X,3/2-Y,-1/2+Z; <sup>10</sup>1/2+X,1/2-Y,1/2+Z; <sup>11</sup>+X,-1+Y,+Z; <sup>12</sup>+X,1-Y,1/2+Z; <sup>13</sup>1/2+X,3/2-Y,1/2+Z; <sup>14</sup>-1/2+X,1/2-Y,1/2+Z; <sup>15</sup>-1/2+X,-1/2+Y,+Z



**Table S5.** Anisotropic displacement parameters ( $\text{\AA}^2 \times 10^3$ ) for  $\text{Na}_{10}\text{Zn}(\text{NO}_3)_4(\text{SO}_3\text{S})_4$ .

| Atom | $U_{11}$  | $U_{22}$  | $U_{33}$ | $U_{23}$ | $U_{13}$ | $U_{12}$ |
|------|-----------|-----------|----------|----------|----------|----------|
| Zn1  | 14.58(18) | 14.58(18) | 32.0(3)  | 0        | 0        | 0        |
| S1   | 12.8(2)   | 30.5(3)   | 38.2(3)  | -14.0(3) | -2.7(2)  | 3.8(2)   |
| S2   | 11.5(2)   | 14.7(2)   | 17.3(2)  | 0.99(19) | 0.06(18) | 0.29(17) |
| O1   | 15.6(8)   | 24.0(8)   | 26.8(8)  | -3.3(6)  | -6.1(6)  | -2.1(6)  |
| O2   | 28.9(9)   | 31.0(9)   | 22.3(8)  | 6.5(7)   | 7.6(7)   | 5.9(7)   |
| O3   | 23.4(8)   | 16.3(7)   | 37.8(9)  | 2.7(7)   | 3.6(8)   | 1.0(6)   |
| O4   | 33.8(10)  | 35.2(10)  | 23.0(8)  | -3.5(8)  | -6.2(7)  | -2.1(8)  |
| O5   | 28.6(9)   | 23.4(8)   | 40.9(10) | 3.1(8)   | 0.4(9)   | -9.8(6)  |
| O6   | 38.6(11)  | 31.3(9)   | 25.6(9)  | 5.5(8)   | 1.4(7)   | -11.2(9) |
| N1   | 21.5(9)   | 19.7(9)   | 19.8(9)  | 1.4(7)   | -1.1(8)  | -2.3(7)  |
| Na1  | 25.2(6)   | 26.2(7)   | 21.8(6)  | 0        | 0        | 9.0(5)   |
| Na2  | 28.1(5)   | 39.9(6)   | 30.2(5)  | 4.6(5)   | -5.0(4)  | -15.2(4) |
| Na3  | 20.2(4)   | 26.7(5)   | 29.3(5)  | -4.8(4)  | -1.6(4)  | 0.0(3)   |

The Anisotropic displacement factor exponent takes the form: -

$$2\pi^2[h^2a^*U_{11}+2hka^*b^*U_{12}+...].$$

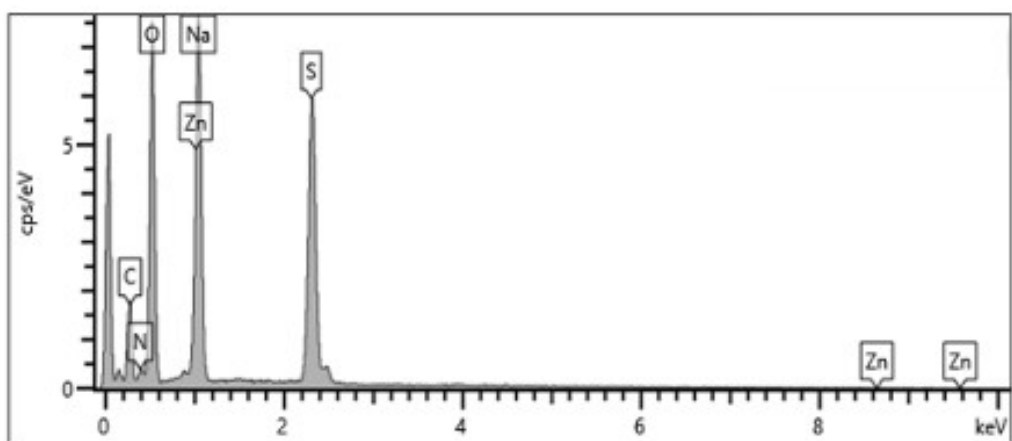

**Figure S1.** Energy dispersive X-ray spectroscopy result for  $\text{Na}_{10}\text{Zn}(\text{NO}_3)_4(\text{SO}_3\text{S})_4$ .

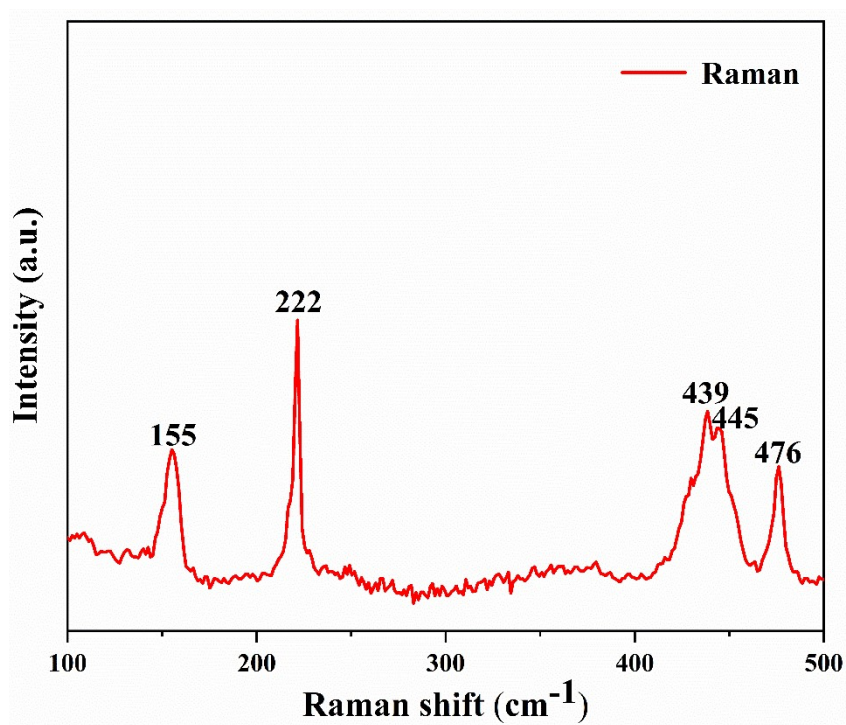

**Figure S2.** Raman spectra of  $\text{Na}_{10}\text{Zn}(\text{NO}_3)_4(\text{SO}_3\text{S})_4$ .

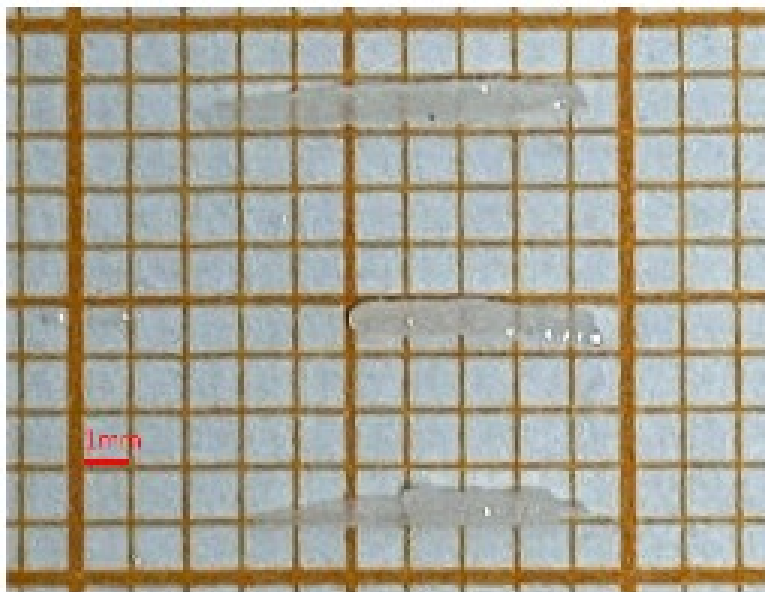

**Figure S3.** The crystal photograph of Na<sub>10</sub>Zn(NO<sub>3</sub>)<sub>4</sub>(SO<sub>3</sub>S)<sub>4</sub>.

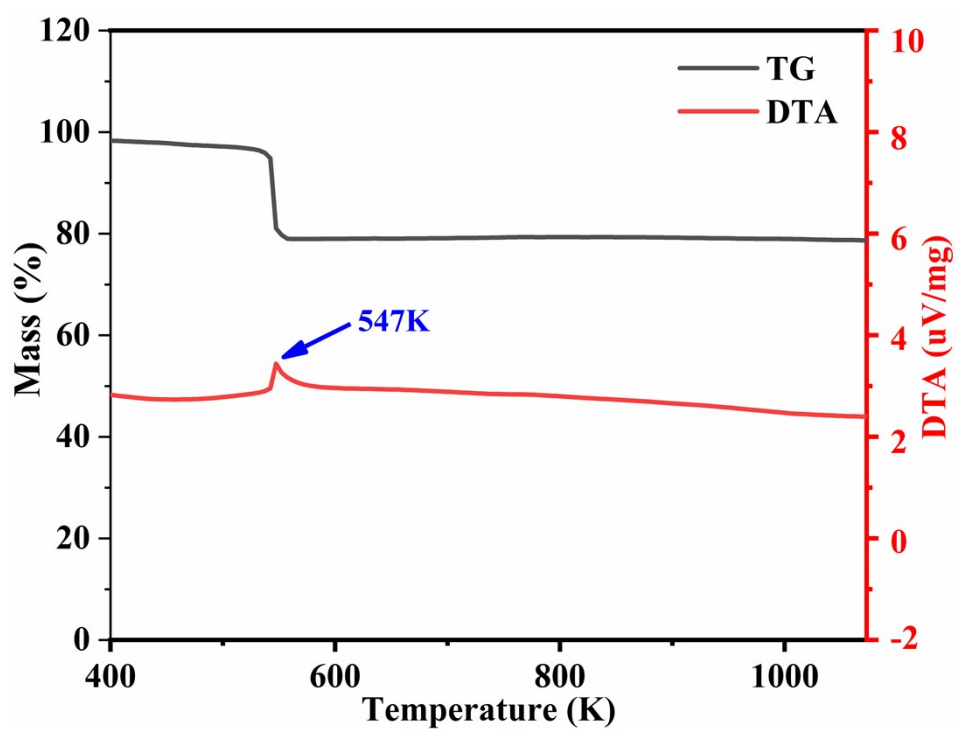

**Figure S4.** TG and TGA curves for Na<sub>10</sub>Zn(NO<sub>3</sub>)<sub>4</sub>(SO<sub>3</sub>S)<sub>4</sub>.

The thermogravimetry (TG) and differential thermal analysis (DTA) curves reveal that Na<sub>10</sub>Zn(NO<sub>3</sub>)<sub>4</sub>(SO<sub>3</sub>S)<sub>4</sub> could be stable up to 547 K (Figure S4). This result indicates that Na<sub>10</sub>Zn(NO<sub>3</sub>)<sub>4</sub>(SO<sub>3</sub>S)<sub>4</sub> possesses a good thermal stability.

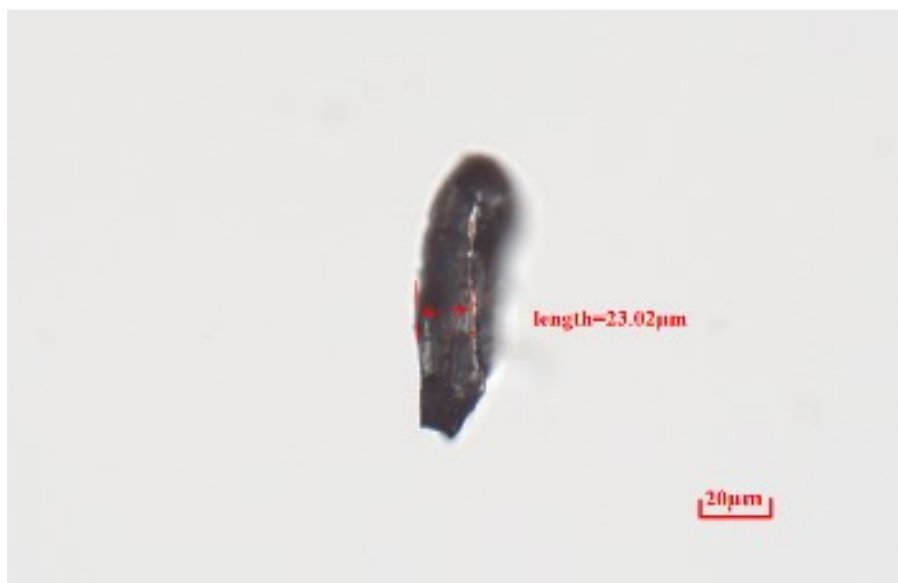

**Figure S5.** The thickness of Na<sub>10</sub>Zn(NO<sub>3</sub>)<sub>4</sub>(SO<sub>3</sub>S)<sub>4</sub>.

## References.

1. W. L. Xie, Y. H. Yun, L. H. Deng, G. M. Li and S. L. Pan, Second-Harmonic Generation-Positive  $\text{Na}_2\text{Ga}_2\text{SiS}_6$  with a Broad Band Gap and a High Laser Damage Threshold, *Inorg. Chem.*, 2022, **61**, 7546-7552.
2. J. Z. Zhou, Y. Chu, J. J. Li and S. L. Pan,  $\text{Ba}_2\text{BS}_3\text{Cl}$  and  $\text{Ba}_5\text{B}_2\text{S}_8\text{Cl}_2$ : first alkaline-earth metal thioborate halides with  $[\text{BS}_3]$  units, *Chem. Commun*, 2021, **57**, 6440-6443.
3. S. X. Ke, H. X. Fan, C. S. Lin, N. Ye and M. Luo, Constructing ultraviolet nonlinear optical crystals with large second harmonic generation and short absorption edges by using polar tetrahedral  $\text{S}_2\text{O}_3$  groups, *Inorg. Chem. Front.*, 2023, **10**, 2811-2817.
